# Supplementary material for: The crystal structure of the ‘pentamethylcyclopentadienyl cation’ is that of the pentamethylcyclopentenyl cationElectronic supplementary information (ESI) available: DFT calculations. See http://www.rsc.org/suppdata/cc/b2/b205081a/
Source: Royal Society of Chemistry journal article supplement (doi:10.1039/b205081a), 2002-06-13
Supplement: b205081a.pdf [file b205081a.pdf]

## SUPPORTING INFORMATION

The crystal structure of the “pentamethylcyclopentadienyl cation” is that of the pentamethylcyclopentyl cation

Jamie N. Jones,<sup>a</sup> Alan H. Cowley<sup>a</sup> and Charles L. B. Macdonald

<sup>a</sup> *Department of Chemistry and Biochemistry  
The University of Texas at Austin  
Austin, Texas 78712 USA*

<sup>b</sup> *Department of Chemistry  
Department of Chemistry and Biochemistry  
The University of Windsor  
Windsor, Ontario N9B 3P4 Canada*

## Summary of Theoretical Results

All calculations done with the Gaussian 98<sup>i</sup> package of programs. Each molecule/ion was fully optimized in the indicated symmetry. Bond lengths are listed in Å and angles are in degrees.

### B3PW91<sup>ii</sup>/6-311G(d)

|                                                               | Symmetry                                   | Ring Protons | Energy (au)     | Relative Energy (kcal/mol) |
|---------------------------------------------------------------|--------------------------------------------|--------------|-----------------|----------------------------|
| [C <sub>5</sub> Me <sub>5</sub> H <sub>2</sub> ] <sup>+</sup> | C <sub>1</sub>                             | trans-alpha  | -<br>390.991443 | 0                          |
| [C <sub>5</sub> Me <sub>5</sub> H <sub>2</sub> ] <sup>+</sup> | C <sub>1</sub>                             | cis-alpha    | -<br>390.989241 | 6<br>1.38                  |
| [C <sub>5</sub> Me <sub>5</sub> H <sub>2</sub> ] <sup>+</sup> | C <sub>1</sub>                             | trans-beta   | -<br>390.948601 | 7<br>26.88                 |
| [C <sub>5</sub> Me <sub>5</sub> H <sub>2</sub> ] <sup>+</sup> | C <sub>1</sub> (approx<br>C <sub>s</sub> ) | cis-beta     | -<br>390.948634 | 4<br>26.86                 |

<sup>i</sup> GAUSSIAN 98 (Revision A.11.1) M. J. Frisch, G. W. Trucks, H. B. Schlegel, G. E. Scuseria, M. A. Robb, J. R. Cheeseman, V. G. Zakrzewski, J. A. Montgomery, Jr., R. E. Stratmann, J. C. Burant, S. Dapprich, J. M. Millam, A. D. Daniels, K. N. Kudin, M. C. Strain, O. Farkas, J. Tomasi, V. Barone, M. Cossi, R. Cammi, B. Mennucci, C. Pomelli, C. Adamo, S. Clifford, J. Ochterski, G. A. Petersson, P. Y. Ayala, Q. Cui, K. Morokuma, P. Salvador, J. J. Dannenberg, D. K. Malick, A. D. Rabuck, K. Raghavachari, J. B. Foresman, J. Cioslowski, J. V. Ortiz, A. G. Baboul, B. B. Stefanov, G. Liu, A. Liashenko, P. Piskorz, I. Komaromi, R. Gomperts, R. L. Martin, D. J. Fox, T. Keith, M. A. Al-Laham, C. Y. Peng, A. Nanayakkara, M. Challacombe, P. M. W. Gill, B. Johnson, W. Chen, M. W. Wong, J. L. Andres, C. Gonzalez, M. Head-Gordon, E. S. Replogle, and J. A. Pople, Gaussian, Inc., Pittsburgh PA, 2001.

<sup>ii</sup> (a) A. D. Becke, *J. Chem. Phys.*, **1993**, *98*, 5648. (b) A. D. Becke, *Phys. Rev. A*, **1988**, *38*, 3098. (c) J. P. Perdew and Y. Wang, *Phys. Rev. B*, **1992**, *45*, 13244.
